1 **Novel differential linear B-cell epitopes to identify Zika and dengue**  
2 **virus infections in patients**

3

4 Siti Naqiah Amrun<sup>1\*</sup>, Wearn-Xin Yee<sup>1\*</sup>, Farhana Abu Bakar<sup>1</sup>, Bennett Lee<sup>1</sup>, Yiu-Wing  
5 Kam<sup>1</sup>, Fok-Moon Lum<sup>1</sup>, Jeslin J.L. Tan<sup>1</sup>, Vanessa W.X. Lim<sup>2</sup>, Wanitda  
6 Watthanaworawit<sup>3</sup>, Clare Ling<sup>3</sup>, Francois Nosten<sup>3,4</sup>, Laurent Renia<sup>1</sup>, Yee-Sin Leo<sup>2,5,6</sup>,  
7 Lisa F.P. Ng<sup>1,7,8,9</sup>

8

9 <sup>1</sup>Singapore Immunology Network, Agency for Science, Technology and Research  
10 (A\*STAR), Singapore 138648, Singapore.

11 <sup>2</sup>Communicable Diseases Centre, Institute of Infectious Diseases and Epidemiology,  
12 Tan Tock Seng Hospital, Singapore 308433, Singapore.

13 <sup>3</sup>Shoklo Malaria Research Unit, Mahidol-Oxford Tropical Medicine Research Unit,  
14 Faculty of Tropical Medicine, Mahidol University, Mae Sot, Thailand.

15 <sup>4</sup>Centre for Tropical Medicine and Global Health, Nuffield Department of Medicine,  
16 University of Oxford, Oxford, UK.

17 <sup>5</sup>Lee Kong Chian School of Medicine, Nanyang Technological University, Singapore  
18 636921, Singapore.

19 <sup>6</sup>Saw Swee Hock School of Public Health, National University of Singapore,  
20 Singapore 117549, Singapore.

21 <sup>7</sup>National Institute of Health Research, Health Protection Research Unit In Emerging  
22 and Zoonotic Infections, Liverpool, UK.

23 <sup>8</sup>Institute of Infection and Global Health, University of Liverpool, Liverpool L69 7BE,  
24 UK.

25 <sup>9</sup>Department of Biochemistry, Yong Loo Lin School of Medicine, National University  
26 of Singapore, Singapore 117597, Singapore.

27

28 \*Equal contributions

29

30 Running title: Linear B-cell ZIKV and DENV epitopes

31

32 Correspondence and requests for reprints: Prof Lisa F.P. Ng,+65-64070028 (office),  
33 +65-64642057 (fax), [lisa\\_ng@immunol.a-star.edu.sg](mailto:lisa_ng@immunol.a-star.edu.sg)

34

35 Abstract word count: 200 words

36 Text word count: 3612 words

37 **Abstract (200 words)**

38 **Background**

39 Recent Zika virus (ZIKV) outbreaks challenged existing laboratory diagnostic  
40 standards, especially for serology-based methods. Due to the genetic and structural  
41 similarity of ZIKV with other flaviviruses, this results in cross-reactive antibodies  
42 which confounds serological interpretations.

43

44 **Methods**

45 Plasma from Singapore ZIKV patients was screened longitudinally for antibody  
46 responses and neutralizing capacities against ZIKV. Samples from healthy controls,  
47 ZIKV and DENV patients were further assessed using ZIKV and DENV peptides of  
48 precursor membrane (prM), envelope (E) or non-structural 1 (NS1) viral proteins in a  
49 peptide-based ELISA for epitope identification. Identified epitopes were re-validated  
50 and diagnostically evaluated using sera of patients with DENV, bacteria or unknown  
51 infections from Thailand.

52

53 **Results**

54 Long-lasting ZIKV-neutralizing antibodies were elicited during ZIKV infection.  
55 Thirteen potential linear B-cell epitopes were identified and of these, four common  
56 flavivirus, three ZIKV-specific, and one DENV-specific differential epitopes had more  
57 than 50% sensitivities and specificities. Notably, ZIKV-specific peptide 26 on domain  
58 I/II of E protein (amino acid residues 271-288) presented 80% sensitivity and 85.7%  
59 specificity. Importantly, the differential epitopes also showed significance in  
60 differentiating non-flavivirus patient samples.

61

62 **Conclusions**

63 Linear B-cell epitope candidates to differentiate ZIKV and DENV infections were  
64 identified, providing the first step towards the design of a much-needed serology-  
65 based assay.

66

67 Keywords: Flavivirus; epitopes; patients; diagnostic

## 68 **Introduction**

69 Zika virus (ZIKV) outbreaks in French Polynesia and Brazil in 2013 and 2015  
70 resulted in unexpected severe neurological and congenital complications [1–4],  
71 leading to a race to develop diagnostic and treatment strategies against the infection.  
72 Current ZIKV diagnosis, which relies heavily on molecular methods, poses several  
73 limitations because ZIKV patients display a short viremic phase with low viremia  
74 levels, and thus may escape detection, even in symptomatic patients [5,6]. Hence  
75 serology, as an alternative diagnostic approach, is very much needed to address  
76 these shortcomings. Unfortunately, this approach has been hampered due to the  
77 cross-reactive nature of the antibodies in ZIKV patients with other flaviviruses, such  
78 as dengue virus (DENV) [7–11], in which ZIKV shares high amino acid identity (55%)  
79 and structural homology with DENV [12–16]. Moreover, as both viruses are  
80 transmitted by the same mosquito vectors [17], they are often found in overlapping  
81 geographical areas [18,19]. Thus, there is a demand for a proper serology diagnostic  
82 tool that accurately differentiates the two infections.

83 Previous studies have shown the possibility of using ZIKV antigens to  
84 distinguish ZIKV infections from other flavivirus infections [11,20–22]. Although  
85 computational studies have predicted multiple differential epitopes, validation on  
86 patient samples however remains a challenge [23]. In this report, antibody and  
87 neutralizing responses by ZIKV patients from Singapore were characterized  
88 longitudinally. Common and differential linear B-cell epitopes recognized by  
89 antibodies from Singapore ZIKV and DENV patients were then identified.  
90 Importantly, the potential value of these identified epitopes in a diagnostic setting  
91 was further assessed using sera from patients from Thailand previously diagnosed  
92 with DENV, bacterial, and including those of unknown infections. This study aims to

93 further the development of a serology-driven differential flavivirus diagnosis,  
94 particularly between ZIKV and DENV, allowing for accurate diagnosis that will  
95 improve patient management. The application can also be further expanded to study  
96 sero-prevalence and vaccine strategies.

97 **Methods**

98 **Ethics statement**

99 Written informed consent was obtained from participants in accordance with the  
100 tenets of the Declaration of Helsinki. Study protocols of Singapore ZIKV (2016-2018)  
101 and DENV (2010-2012) patient cohorts were approved by the SingHealth  
102 Centralized Institutional Review Board (CIRB Ref: 2016/2219) and National  
103 Healthcare Group (NHG) Domain Specific Review Board (DSRB-E-2009/432)  
104 respectively. Specimens from Singapore healthy donors (2010-2015) and patients  
105 from Thailand (2011-2013) were collected in accordance to study guidelines of  
106 approval numbers: NUS-IRB 09-256 and NUS-IRB 10-445; MUTM 2011-008-01,  
107 OXTREC 42-10 and TCAB-01-11 respectively.

108

109 **Study subjects and sample collection**

110 ***Singapore ZIKV patients***

111 Collection of specimens from subjects during the ZIKV outbreak in 2016 was  
112 previously described [24]. Briefly, 65 patients that were RT-PCR positive for ZIKV in  
113 whole blood or urine, and negative for DENV RT-PCR were enrolled [25]. Whole  
114 blood specimens were collected in EDTA-coated vacutainer tubes (Becton  
115 Dickinson) after peripheral venipuncture and were centrifuged at 12000 rpm for 10  
116 min. Plasma was collected and heat-inactivated for 30 min at 56°C before storage at  
117 -80°C. Specimens were obtained over a period of six time points: (1) acute [2-7 days  
118 post-illness onset (pio)], (2) early convalescent (10-14 days pio), (3) late  
119 convalescent (1 month pio), (4) early recovery (3 months pio), (5) late recovery (5-6  
120 months pio), and (6) full recovery (1 year pio) phases.

121

122 ***Singapore DENV patients***

123 Twenty DENV patient serum samples (2010-2012) collected before the ZIKV  
124 outbreak were used in this study [26]. Patients were DENV PCR and/or NS1 positive  
125 upon hospital admission, and were a combination of the following: one unknown  
126 serotype, six DENV-1, seven DENV-2, three DENV-3, and three DENV-4 patients.  
127 Serum samples used were obtained at late convalescent phase (21-37 days pio).

128

129 ***Thailand patients***

130 Archived serum samples from an undifferentiated fever study conducted at Shoklo  
131 Malaria Research Unit (SMRU) were used. Five DENV patients were confirmed by  
132 gold standard paired serology, and all but one was DENV PCR positive. Five  
133 bacteria-infected patients were diagnosed with leptospirosis, scrub typhus, murine  
134 typhus or *Streptococcus pneumoniae* infections, or a combination of above, and all  
135 were DENV PCR and DENV NS1, IgM and IgG RDT negative. Eight patients with  
136 unknown diagnoses were negative for the above pathogens by serology, blood  
137 culture and PCR. Convalescent serum samples used were collected at 14-20 days  
138 pio.

139

140 **Viruses**

141 ZIKV Polynesian isolate (H/PF/2013) was obtained from the European Virus Archive  
142 (EVA). DENV-3 was used as a reference DENV serotype because it is widespread in  
143 Southeast Asia [27–30], and was kindly provided by the National Public Health  
144 Laboratory (NPHL), Singapore. CHIKV SGP011 was isolated from a patient [31].  
145 Viruses were propagated in VeroE6 cells (ATCC) and purified via ultracentrifugation  
146 [32] before being titered by standard plaque assays in VeroE6 cells [33,34].



147

#### 148 **Virion-based ELISA**

149 Antibody titers were determined by a virion-based ELISA as previously described  
150 [18,32,34–36]. Briefly, purified virus was immobilized on 96-well maxisorp microtiter  
151 plates overnight (Nunc). Wells were blocked with 0.05% PBST [0.05% Tween-20  
152 (Sigma-Aldrich) in PBS] containing 5% skim milk (Nacalai Tesque) at 37°C for 1.5 h.  
153 Heat-inactivated patient and pooled healthy control plasma samples at 1:200 to  
154 1:8000 dilutions prepared in PBST with 2.5% milk were incubated at 37°C for 1 h.  
155 HRP-conjugated goat anti-human IgM or IgG (H+L) (Invitrogen) or mouse anti-  
156 human IgG1, IgG2, IgG3 and IgG4 (Thermo Fischer Scientific) antibodies were used  
157 for detection. Reactions were developed using TMB (3,3,5,5-tetramethyl benzidine)  
158 substrate (Sigma-Aldrich) and terminated with Stop reagent (Sigma-Aldrich), and  
159 absorbance was measured at 450 nm in a microplate autoreader (Tecan) [18,32,34–  
160 36]. ELISA readings were conducted in duplicates or triplicates.

161

#### 162 **Sero-neutralization**

163 Neutralizing capacity of antibodies from ZIKV patients were determined via flow  
164 cytometry [37]. Briefly, pooled patient and healthy plasma samples at 1:1000 dilution  
165 were incubated with ZIKV or DENV-3 at MOI 10 for 2 h at 37°C with gentle agitation  
166 (350 rpm). Virus-antibody suspensions were then added in duplicates to HEK 293T  
167 cells (ATCC) at 37°C. After 2 h, media were removed and Dulbecco's Modified Eagle  
168 Medium (DMEM; HyClone) with 10% fetal bovine serum (FBS; HyClone) were  
169 added. After 48 h, cells were harvested and stained as described [37], using ZIKV  
170 NS3 protein-specific rabbit polyclonal antibody [38] or DENV human monoclonal  
171 antibody 1B [34], and counter-stained with fluorophore-tagged goat anti-rabbit or

172 anti-human IgG (H+L) (Life Technologies) respectively. Cells were acquired with  
173 MacsQuant Analyzer 10 (Miltenyi-Biotec). Flow cytometry results were analyzed with  
174 FlowJo (version 10.4.1, Tree Star Inc). Data of patient and pooled healthy  
175 neutralization assays were normalized using the respective untreated infections and  
176 calculated as a percentage of virus-only control infection.

177

## 178 **Epitopes determination**

### 179 ***Linear peptide libraries***

180 The sequences used for the design of biotinylated linear peptides of prM, E and NS1  
181 proteins were derived from ZIKV Polynesian isolate (KJ776791) and consensus  
182 sequence of DENV-3 strains (KR296743, KF973487, EU081181, KF041254,  
183 JF808120, JF808121, KJ189293, KC762692, KC425219, KJ830751, KF973479, and  
184 AY099336) [32,34,36]. Peptides were generated as a ZIKV and DENV peptide-pair  
185 of corresponding sequences. Preliminary epitope screening was used with a library  
186 of peptides (Mimotopes) consisting of 18-mer overlapping sequences. Five peptides  
187 were combined to form one pooled peptide set. Screening and validation of patients  
188 were done with higher purity of peptides ( $\geq 90\%$ , EMC microcollections GmbH) with  
189 lengths ranging from 11 to 22-mer (Supplementary Table 1). Peptides were  
190 dissolved in DMSO (Sigma-Aldrich) to obtain a stock concentration of 3.75  $\mu\text{g}/\mu\text{l}$ .

191

### 192 ***Peptide-based ELISA***

193 Epitope determination was performed via peptide-based ELISA as previously  
194 described [32,34,36]. Briefly, streptavidin-coated plates (Pierce) were blocked with  
195 0.1% PBST (0.1% Tween-20 in PBS) containing 1% sodium caseinate (Sigma-  
196 Aldrich) and 1% bovine serum albumin (BSA; Sigma-Aldrich) overnight at 4°C,

197 before addition of biotinylated peptides (1:1000 dilution in 0.1% PBST), followed by  
198 heat-inactivated pooled healthy control and patient plasma/serum samples (1:2000  
199 dilution in 0.1% PBST). HRP-conjugated goat-anti human IgG (H+L) antibody  
200 (Invitrogen) prepared in 0.1% blocking buffer was used for detection of peptide-  
201 bound antibodies. TMB substrate and Stop reagent (Sigma-Aldrich) were used for  
202 development, prior to absorbance measurements at 450 nm (Tecan) [32,34,36]. All  
203 incubation steps were at room temperature for 1 h on a rotating shaker, and ELISA  
204 readings were conducted in duplicates.

205

### 206 ***Data analysis***

207 OD values obtained from ZIKV and DENV peptide-based ELISA experiments were  
208 first normalized against mean OD values of pooled healthy donors. Patient samples  
209 were considered positive if the normalized response was more than 1.01.  
210 Subsequently, peptide binding capacity was calculated using the normalized values  
211 as [(ZIKV peptide response – DENV peptide response)/DENV peptide response].  
212 Binding capacities with positive values denote the binding preference of the sample  
213 to ZIKV peptide, whereas negative values denote a binding preference to the  
214 corresponding DENV peptide. Difference in the mean peptide binding capacity of  
215 ZIKV patients and DENV patients of a peptide-pair (i.e. ZIKV and DENV peptides  
216 with complementary sequence) was calculated. Peptides with a relative difference of  
217 0.1 or more are considered to be differential ZIKV (red) and DENV (blue) epitopes of  
218 interest, whereas peptides with a difference of 0.05 or less, and share amino acid  
219 similarity between the peptide-pair (Supplementary Table 1) are considered as  
220 common flavivirus epitopes (green).

221

## 222 **Data visualization and statistical analysis**

223 Heat-maps were generated using Multi Experiment Viewer (version 4.8, Microarray  
224 Software Suite TM4). For structural localization, data were retrieved from PDB 5IZ7  
225 (ZIKV E) and 5K6K (ZIKV NS1). ZIKV prM and other DENV-3 proteins were  
226 simulated using Phyre [39]. For ZIKV prM, DENV-3 prM and E proteins, their  
227 structures were modeled based on PDB 4B03, and DENV-3 NS1 protein was  
228 modeled based on PDB 5K6K. All structures were visualized using PyMol  
229 (Schrodinger). Principal component analysis (PCA) was performed using the OD  
230 values of the anti-peptide IgG response by patients using prcomp function in R.

231 Statistics were done using GraphPad Prism (version 7.03). Mann-Whitney  
232 two-tailed tests with Bonferroni correction for multiple testing, or Kruskal-Wallis tests  
233 with Bonferroni correction for multiple testing, and post hoc tests using Dunn's  
234 multiple comparison tests were used to derive any statistical significance. Correlation  
235 analysis was carried out using Spearman's rank correlation. *P* values less than 0.05  
236 are considered significant.

## 237 **Results**

### 238 **ZIKV patients produce a robust and protective humoral response**

239 Forty-five healthy donors were first screened for the presence of IgM and IgG  
240 against ZIKV, DENV and chikungunya virus (CHIKV), the three main arboviruses co-  
241 circulating in Singapore and several parts of Asia [18] using virion-based ELISA  
242 [18,32,34–36]. Twenty-two donors which had antibody levels lower than the  
243 assigned cut-off (mean + SD) in all three viruses (Supplementary Figures 1A-B)  
244 were used as the healthy control pool, and set as a baseline reference.

245         Anti-ZIKV IgM and IgG levels of ZIKV patients from the Singapore outbreak in  
246 2016 [24,25,38] were longitudinally assessed using virion-based ELISA [18,32,34–  
247 36]. Majority of the patients showed a robust ZIKV-specific humoral response  
248 (Figures 1A-C, Supplementary Figure 1C). Anti-ZIKV IgM was detected as early as  
249 in the acute phase (2-7 days pio), and peaked at early convalescent (10-14 days  
250 pio), before decreasing during the recovery phases (3 months to 1 year pio) (Figures  
251 1A and 1C, Supplementary Figure 1C). ZIKV-specific IgG titers peaked at early  
252 convalescent, persisted at high levels during late recovery, and were still detectable  
253 a year after infection (Figures 1B-C, Supplementary Figure 1C). These patients were  
254 also screened for the presence of DENV-specific antibodies and 80% of the patients  
255 were negative for anti-DENV IgM in samples taken at the acute phase  
256 (Supplementary Figures 1D and 1F). However, 75% of the patients were found to  
257 have anti-DENV IgG (Supplementary Figures 1E-F), suggesting that ZIKV IgG, but  
258 not IgM, cross-reacts with DENV.

259         IgG isotypes produced by ZIKV patients were then determined and highest  
260 titers of anti-ZIKV IgG1 and IgG3 subtypes were produced at early convalescent for  
261 IgG3, and late convalescent for IgG1 (Figure 1D). To determine if antibodies

262 produced in these patients were protective against ZIKV, neutralization assays were  
263 carried out via flow cytometry. Efficient neutralization (71% to 93%) was observed in  
264 early and late convalescent stages (Figure 1E), whilst weak neutralization (37% to  
265 47%) was seen in late and full recovery stages (Figure 1F). Neutralization capacity of  
266 ZIKV patients correlated with levels of anti-ZIKV IgG (Supplementary Figures 1C and  
267 4A). Plasma from these patients only minimally neutralized DENV (Supplementary  
268 Figures 1G-H), indicating ZIKV-specificity.

269

### 270 **Identification of specific B-cell linear epitopes recognized by antibodies from** 271 **ZIKV and DENV patients**

272 Preliminary mapping of specific ZIKV and DENV epitopes was first performed in a  
273 peptide-based ELISA on the most antigenic flavivirus antigens: prM, E and NS1  
274 [32,34,40], using pooled linear ZIKV and consensus DENV peptides. Plasma/serum  
275 samples of ZIKV and DENV patients [26] taken at the late convalescent phase were  
276 used as IgG levels were highest at this time point (Supplementary Figure 1C).  
277 Results specifically showed two common flavivirus (pools 1 and 21), six potential  
278 ZIKV-specific (pools 6, 10, 11, 16, 17 and 24) and one potential DENV-specific (pool  
279 19) pools were identified within the ZIKV and DENV proteome (Supplementary Table  
280 2, Supplementary Figure 2). Thereafter, new peptides selectively designed based on  
281 exposed residues and computational predictions were re-synthesized for subsequent  
282 experiments (Supplementary Table 1) [23].

283 Interestingly, results showed differences between pooled and individual  
284 peptides (Table 1, Figure 2). These differences could be due to interferences of the  
285 pooled peptides, while single peptides allowed for more enhanced specific binding.  
286 Nevertheless, six potential common flavivirus peptides were identified which

287 displayed less than 0.05 relative difference in the binding capacity between ZIKV and  
288 DENV patients (peptides 7, 36, 38, 39, 46, 49) (Table 1, Figure 2, Supplementary  
289 Figure 3). These peptides were also selected based on the close similarity between  
290 the ZIKV and DENV peptide sequence (Supplementary Table 1). Additionally, three  
291 potential ZIKV-specific (peptides 3, 26 and 32), and four potential DENV-specific  
292 peptides (peptides 9, 17, 43 and 45) with a binding capacity difference of more than  
293 0.1 were identified (Table 1, Figure 2, Supplementary Figure 3).

294

### 295 **Epitope recognition by ZIKV patients over time**

296 In order to characterize the changes in epitope recognition by ZIKV patients over  
297 time, the common flavivirus (green) and ZIKV-specific peptides (red) were screened  
298 with plasma of ZIKV patients in acute, late convalescent, and full recovery phases.  
299 For the common flavivirus hits, more than 60% of the ZIKV patients were able to  
300 recognize the six peptide-pairs at late convalescent and beyond (Figure 3A).  
301 However, at the acute phase, only peptides 7, 36 and 38 were recognized by ZIKV  
302 patients (Figure 3A). In terms of binding capacity, there was equal binding between  
303 ZIKV and DENV peptide-pairs over time for peptides 7, 36, 38 and 49 (Figure 3B).

304 For ZIKV-specific epitopes, more than 60% of the ZIKV patient samples were  
305 able to recognize peptides 3 and 26 (Figure 3A), with positive peptide binding  
306 capacity (Figure 3B) at late convalescent phase. On the other hand, peptide 32  
307 showed strong recognition by the patient samples (Figure 3A) as well as high binding  
308 capacity (Figure 3B) at various time points from acute to full recovery. The  
309 localization of all potential epitopes within the viral proteins are shown in Figures 3C-  
310 E.

311

## 312 **Evaluation of epitopes with patient cohorts**

313 To assess the diagnostic performance of identified epitopes, the 13 peptides were  
314 screened using patient serum samples from a Thailand cohort that had DENV,  
315 bacteria, or unknown infections. Results of a randomized selection of Singapore  
316 ZIKV and DENV patients were also analyzed in parallel (Supplementary Table 3).

317 Interestingly, results showed a wide range of specificity and sensitivity for  
318 each peptide (Table 2, Figure 4A). ZIKV-specific peptide 26 (amino acid residues  
319 271-288) on the E protein of domain I/II (EDI/II) had the best sensitivity and  
320 specificity profile (80% and 85.7% respectively) (Table 2, Figure 4A). Nevertheless,  
321 eight peptides (common flavivirus peptides 36, 38, 46, 49; ZIKV-specific peptides 3,  
322 26, 32; and DENV-specific peptide 9) showed more than 50% sensitivity and  
323 specificity (Table 2, Figure 4A), and were selected for further evaluation. These  
324 peptides were used to “diagnose” the patients (Supplementary Table 4), and the  
325 performance of the peptide combination based on the epitope groupings were  
326 determined collectively (Table 2, Figure 4B). Although the common flavivirus (green)  
327 and DENV-specific (blue) groups demonstrated modest measurements, the ZIKV-  
328 specific (red) peptide mix showed a robust specificity of 96.4% (Table 2, Figure 4B).  
329 Furthermore, when the anti-peptide IgG response of patients was plotted in a  
330 principal component analysis (PCA), it was observed that patients of different  
331 diagnoses and cohorts formed separate clusters, and ZIKV patients stood out when  
332 compared to the healthy control (Figure 4C). To identify peptides with discriminating  
333 power, the binding capacity of positive peptides were calculated. The virus-specific  
334 ZIKV and DENV epitopes were significantly differential (Figure 4D). Peptide 32  
335 (amino acid residues 453-470 on E protein) was the best performing ZIKV-specific  
336 epitope, and was able to distinguish Singapore ZIKV patients from bacteria and



337 unknown infections from Thailand (Figures 4D-E). DENV-specific peptide 9 (amino  
338 acid residues 78-92 on prM) could be used to differentiate Singapore DENV patients  
339 from bacteria-infected patients from Thailand (Figure 4E). Overall, we have identified  
340 the best differential epitopes to differentiate between DENV and ZIKV patients.

341 **Discussion**

342 ZIKV patients were shown to produce high levels of ZIKV-specific IgG antibodies.  
343 Specifically, IgG1 and IgG3 were the subclasses induced following ZIKV infection,  
344 closely resembling DENV-infected patients [41]. Although patients from this cohort  
345 had detectable DENV IgG levels due to the high level of cross-reactivity among  
346 flaviviruses [7–10], DENV neutralization was significantly less efficient compared to  
347 ZIKV, indicating that the antibodies were ZIKV-specific (Figures 1E-F,  
348 Supplementary Figure 1G-H). This observation is also supported by another study, in  
349 which the profiles of ZIKV neutralizing antibodies of patients from Nicaragua, Sri  
350 Lanka and Thailand were not affected by previous DENV infection [42]. Nonetheless,  
351 it is imperative to consider the possible implications of virus-infection enhancement  
352 [43]. Moreover, none of the ZIKV patients in our study displayed severe symptoms to  
353 suggest occurrence of antibody-dependent enhancement (ADE) [24], and similar  
354 observations were also reported from Brazil [43,44].

355 While various reports have shown the specificity of the NS1 antigen to  
356 differentiate between ZIKV and DENV [11,20,21,45,46], majority of the common  
357 flavivirus peptides identified in this study are on the NS1 protein, possibly due to the  
358 conserved regions of NS1 amongst the flaviviruses [8,47]. For example, common  
359 flavivirus peptides 36 (amino acid residues 70-85), 38 (amino acid residues 119-136)  
360 and 49 (amino acid residues 315-326) were identified as ZIKV-specific in other  
361 patient cohorts from South America [45,46]. However, it remains to be seen if these  
362 peptides could be used to detect all flaviviruses such as yellow fever virus (YFV) and  
363 Japanese encephalitis virus (JEV).

364 Differential ZIKV and DENV epitopes identified were located across prM, E  
365 and NS1. Of interest, DENV-specific peptide 17 (amino acid residues 131-149) and

366 ZIKV-specific peptide 26 are found on EDI and EDII of E glycoprotein, which share  
367 35% and 51% amino acid identity between ZIKV and DENV respectively [8],  
368 whereas ZIKV-specific peptide 32 is located on the stem (Figure 3D). It would also  
369 be useful to assess the use of the identified peptides as a ZIKV vaccine target,  
370 particularly peptides 26 and 32. Interestingly, despite the similarity between the  
371 sequence of these ZIKV and DENV peptide-pairs (Supplementary Table 1), they  
372 were able to distinguish ZIKV and DENV patients. Moreover, ZIKV patients at  
373 different disease stages have different peptide recognition, and the current set-up  
374 could identify ZIKV infection at any point, independent of the patients' level of ZIKV-  
375 specific antibodies (Supplementary Figure 4B-C). However, given that the identified  
376 epitopes were screened and validated using adult patient samples, it would be  
377 important to assess how these epitope profiles will perform in other patient cohorts,  
378 specifically ZIKV-infected pregnant women from Brazil [36].

379 Intriguingly, the Singapore DENV and Thailand DENV patients were not  
380 clustered together in the PCA (Figure 4B). Most of the Singapore DENV patients  
381 selected for validation had moderate to severe forms of plasma leakage, a clinical  
382 feature of severe manifestations of DENV infection [48], whereas DENV patients  
383 from Thailand displayed mild symptoms (unpublished data). The latter being  
384 “negative” in our assays could thus be due to differences in epitope recognition in  
385 different DENV disease states [40], and the different strain of viruses circulating in  
386 Singapore and Thailand. Nonetheless, further refinements are required to identify  
387 serotype-specific DENV epitopes.

388 Furthermore, comparing these results and computationally-predicted  
389 diagnostic peptide regions [23] revealed differences. Firstly, majority of the  
390 computationally predicted peptide regions were not ZIKV-specific. NS1 peptide 36,

391 for example, was predicted to be differential [23], but was in fact a common  
392 flavivirus. However, peptides 26 and 32 on E protein, which were predicted to  
393 contain diagnostic epitopes [23], were indeed shown to be ZIKV-specific in this  
394 study. Thus, computational prediction remains useful to narrow down possible  
395 epitope candidates.

396 Overall, this study offers important valuable information on the human  
397 antibody response against ZIKV and insights into epitope cross-reactivity. Notably,  
398 several novel differential ZIKV and DENV epitopes with potential diagnostic  
399 efficacies have been identified on prM and E proteins. These results offer useful  
400 insights towards the development of diagnostics or vaccines.

401 **Funding**

402 This work was supported by core research grants provided to the Singapore  
403 Immunology Network (SIgN) by the Biomedical Research Council (BMRC) and also  
404 partially supported by the BMRC A\*STAR-led Zika Virus Consortium Fund [project  
405 number: 15/1/82/27/001], Agency for Science, Technology and Research (A\*STAR),  
406 Singapore. SIgN Immunomonitoring and Flow Cytometry platforms are supported by  
407 BMRC IAF 311006 grant and BMRC transition funds #H16/99/b0/011.

408

409 **Conflicts of interest**

410 All authors have no conflict.

411

412 **Acknowledgements**

413 We thank Nicholas Q.R. Kng for assisting with the experiments, Kai-Er Eng for  
414 assisting with the manuscript, and Cheryl Y.P. Lee, Yi-Hao Chan, Guillaume  
415 Carissimo, Siew-Wai Fong and Jonathan Cox for processing of patient samples  
416 (SIgN); Vincent Pang, Linda Lee and research assistants from Tan Tock Seng  
417 Hospital; SMRU clinic and microbiology laboratory staff for patient recruitment,  
418 sample preparation and laboratory diagnosis, Mahidol-Oxford Tropical Medicine  
419 Research Unit (MORU) microbiology staff for supporting Rickettsia reference  
420 serology testing, and Armed Forces Research Institute of Medical Sciences  
421 (AFRIMS) for dengue reference serology testing; National Public Health Laboratory  
422 (NPHL) for providing DENV-3 virus; Prof Andres Merits for providing the ZIKV NS3  
423 protein-specific rabbit polyclonal antibody; and study participants for their  
424 participation in the study.

425 **References**

- 426 1. Teixeira MG, Conceição N Costa M Da, Oliveira WK De, Nunes ML, Rodrigues  
427 LC. The epidemic of Zika virus-related microcephaly in Brazil: Detection,  
428 control, etiology, and future scenarios. *Am J Public Health*. **2016**; 106(4):601–  
429 605.
- 430 2. Barcellos C, Xavier DR, Pavão AL, et al. Increased hospitalizations for  
431 neuropathies as indicators of Zika virus infection, according to health  
432 information system data, Brazil. *Emerg Infect Dis*. **2016**; 22(11):1894–1899.
- 433 3. He D, Gao D, Lou Y, Zhao S, Ruan S. A comparison study of Zika virus  
434 outbreaks in French Polynesia, Colombia and the State of Bahia in Brazil. *Sci*  
435 *Rep*. **2017**; 7(1):1–6.
- 436 4. Cauchemez S, Besnard M, Bompard P, et al. HHS Public Access. **2016**;  
437 387(10033):2125–2132.
- 438 5. Wilson HL, Tran T, Druce J, Dupont-Rouzeyrol M, Catton M. Neutralization  
439 Assay for Zika and Dengue Viruses by Use of Real-Time-PCR-Based Endpoint  
440 Assessment. McAdam AJ, editor. *J Clin Microbiol*. **2017**; 55(10):3104 LP-3112.
- 441 6. Goncalves A, Peeling RW, Chu MC, et al. Innovative and New Approaches to  
442 Laboratory Diagnosis of Zika and Dengue: A Meeting Report. *J Infect Dis*.  
443 **2018**; 217(7):1060–1068.
- 444 7. Priyamvada L, Quicke KM, Hudson WH, et al. Human antibody responses  
445 after dengue virus infection are highly cross-reactive to Zika virus. *Proc Natl*  
446 *Acad Sci*. **2016**; 113(28):7852–7857.
- 447 8. Stettler K, Beltramello M, Espinosa DA, et al. Specificity, cross-reactivity and  
448 function of antibodies elucidated by Zika virus infection. *Science (80- )*. **2016**;  
449 353(6296):247–252.

- 450 9. Kawiecki AB, Christofferson RC. Zika Virus-Induced Antibody Response  
451 Enhances Dengue Virus Serotype 2 Replication in Vitro. *J Infect Dis.* **2016**;  
452 214(9):1357–1360.
- 453 10. Barba-Spaeth G, Dejnirattisai W, Rouvinski A, et al. Structural basis of potent  
454 Zika–dengue virus antibody cross-neutralization. *Nature.* **2016**; 536:48.
- 455 11. Wong SJ, Furuya A, Zou J, et al. A Multiplex Microsphere Immunoassay for  
456 Zika Virus Diagnosis. *EBioMedicine.* **2017**; 16:136–140.
- 457 12. Chang H-H, Huber RG, Bond PJ, et al. Systematic analysis of protein identity  
458 between Zika virus and other arthropod-borne viruses. *Bull World Health  
459 Organ.* **2017**; 95(7):517–525I.
- 460 13. Xu X, Vaughan K, Weiskopf D, et al. Identifying Candidate Targets of Immune  
461 Responses in Zika Virus Based on Homology to Epitopes in Other Flavivirus  
462 Species. *PLoS Curr.* **2016**; 8.
- 463 14. Xu X, Song H, Qi J, et al. Contribution of intertwined loop to membrane  
464 association revealed by Zika virus full-length NS1 structure. *EMBO J.* **2016**;  
465 35(20):2170–2178.
- 466 15. Harrison SC. Immunogenic cross-talk between dengue and Zika viruses. *Nat  
467 Immunol.* **2016**; 17(9):1010–1012.
- 468 16. Mohns MS, Bailey A, Breitbach ME, et al. Antibody responses to Zika virus  
469 proteins in pregnant and non-pregnant macaques. *PLoS Negl Trop Dis.* **2018**;  
470 12(11):e0006903.
- 471 17. Funk S, Kucharski AJ, Camacho A, et al. Comparative Analysis of Dengue and  
472 Zika Outbreaks Reveals Differences by Setting and Virus. *PLoS Negl Trop Dis.*  
473 **2016**; 10(12):1–16.
- 474 18. Chia PY, Yew H Sen, Ho H, et al. Clinical features of patients with Zika and

- 475 dengue virus co-infection in Singapore. *J Infect.* **2017**; 74(6):611–615.
- 476 19. Campos G, Bandeira A, Sardi S. Zika Virus Outbreak, Bahia Brazil. *Emerg*  
477 *Infect Dis.* **2015**; 21(10):1881.
- 478 20. Steinhagen K, Probst C, Radzimski C, et al. Serodiagnosis of Zika virus (ZIKV)  
479 infections by a novel NS1-based ELISA devoid of cross-reactivity with dengue  
480 virus antibodies: A multicohort study of assay performance, 2015 to 2016.  
481 *Eurosurveillance.* **2016**; 21(50):1–16.
- 482 21. Balmaseda A, Stettler K, Medialdea-Carrera R, et al. Antibody-based assay  
483 discriminates Zika virus infection from other flaviviruses. *Proc Natl Acad Sci.*  
484 **2017**; :201704984.
- 485 22. Mishra N, Caciula A, Price A, et al. Diagnosis of Zika virus infection by peptide  
486 array and ELISA. *MBio.* **2018**; 9(2):1–16.
- 487 23. Lee AJ, Bhattacharya R, Scheuermann RH, Pickett BE. Identification of  
488 diagnostic peptide regions that distinguish Zika virus from related mosquito-  
489 borne Flaviviruses. *PLoS One.* **2017**; 12(5):1–18.
- 490 24. Lum F-M, Lye DCB, Tan JJL, et al. Longitudinal Study of Cellular and  
491 Systemic Cytokine Signatures to Define the Dynamics of a Balanced Immune  
492 Environment During Disease Manifestation in Zika Virus–Infected Patients. *J*  
493 *Infect Dis.* **2018**; :jij225–jij225.
- 494 25. Ho ZJM, Hapuarachchi HC, Barkham T, et al. Outbreak of Zika virus infection  
495 in Singapore: an epidemiological, entomological, virological, and clinical  
496 analysis. *Lancet Infect Dis.* **2017**; 17(8):813–821.
- 497 26. Low JGH, Ooi E-E, Tolfvenstam T, et al. Early Dengue infection and outcome  
498 study (EDEN) - study design and preliminary findings. *Ann Acad Med*  
499 *Singapore.* **2006**; 35(11):783–789.



- 500 27. Messina JP, Brady OJ, Scott TW, et al. Global spread of dengue virus types:  
501 mapping the 70 year history. *Trends Microbiol.* **2014**; 22(3):138–146.
- 502 28. Suwandono A, Kosasih H, Nurhayati, et al. Four dengue virus serotypes found  
503 circulating during an outbreak of dengue fever and dengue haemorrhagic fever  
504 in Jakarta, Indonesia, during 2004. *Trans R Soc Trop Med Hyg.* **2006**;  
505 100(9):855–862.
- 506 29. Ng L-C, Chem Y-K, Koo C, et al. 2013 dengue outbreaks in Singapore and  
507 Malaysia caused by different viral strains. *Am J Trop Med Hyg.* **2015**;  
508 92(6):1150–1155.
- 509 30. Rajarethinam J, Ang L, Ong J, et al. Dengue in Singapore from 2004 to  
510 2016□: Cyclical Epidemic Patterns Dominated by Serotypes 1 and 2. *Am J*  
511 *Trop Med Hyg.* **2018**; 99(1):204–210.
- 512 31. Her Z, Malleret B, Chan M, et al. Active Infection of Human Blood Monocytes  
513 by Chikungunya Virus Triggers an Innate Immune Response. *J Immunol.*  
514 **2010**; 184(10):5903-13.
- 515 32. Kam YW, Lum FM, Teo TH, et al. Early neutralizing IgG response to  
516 Chikungunya virus in infected patients targets a dominant linear epitope on the  
517 E2 glycoprotein. *EMBO Mol Med.* **2012**; 4(4):330–343.
- 518 33. Hamel R, Dejarnac O, Wichit S, et al. Biology of Zika Virus Infection in Human  
519 Skin Cells. *J Virol. United States*; **2015**; 89(17):8880–8896.
- 520 34. Kam Y-W, Lee CY-P, Teo T-H, et al. Cross-reactive dengue human  
521 monoclonal antibody prevents severe pathologies and death from Zika virus  
522 infections. *JCI Insight.* **2017**; 2(8):1–10.
- 523 35. Kam YW, Simarmata D, Chow A, et al. Early appearance of neutralizing  
524 immunoglobulin G3 antibodies is associated with chikungunya virus clearance

- 525 and long-term clinical protection. *J Infect Dis.* **2012**; 205(7):1147–1154.
- 526 36. Kam Y-W, Leite JA, Amrun SN, et al. ZIKV-specific NS1 epitopes as  
527 serological markers of acute Zika virus infection. *J Infect Dis.* **2019**; pii: jiz092.
- 528 37. Ang LW, Kam YW, Lin C, et al. Seroprevalence of antibodies against  
529 chikungunya virus in Singapore resident adult population. *PLoS Negl Trop Dis.*  
530 **2017**; 11(12):1–13.
- 531 38. Lum F-M, Lin C, Susova OY, et al. A Sensitive Method for Detecting Zika Virus  
532 Antigen in Patients' Whole-Blood Specimens as an Alternative Diagnostic  
533 Approach. *J Infect Dis.* **2017**; 216(2):182–190.
- 534 39. Kelley LA, Mezulis S, Yates CM, Wass MN, Sternberg MJE. The Phyre2 web  
535 portal for protein modeling, prediction and analysis. *Nat Protoc.* **2015**; 10:845.
- 536 40. Vaughan K, Greenbaum J, Blythe M, Peters B, Sette A. Meta-analysis of All  
537 Immune Epitope Data in the *Flavivirus* Genus: Inventory of Current Immune  
538 Epitope Data Status in the Context of Virus Immunity and Immunopathology.  
539 *Viral Immunol.* **2010**; 23(3):259–284.
- 540 41. Koraka P, Suharti C, Setiati TE, et al. Kinetics of Dengue Virus-Specific Serum  
541 Immunoglobulin Classes and Subclasses Correlate with Clinical Outcome of  
542 Infection Kinetics of Dengue Virus-Specific Serum Immunoglobulin Classes  
543 and Subclasses Correlate with Clinical Outcome of Infection. *J Clin Microbiol.*  
544 **2001**; 39(12):4332–4338.
- 545 42. Montoya M, Collins M, Dejnirattisai W, et al. Longitudinal analysis of antibody  
546 cross-neutralization following zika virus and dengue virus infection in Asia and  
547 the Americas. *J Infect Dis.* **2018**; 218(4):536–545.
- 548 43. Martín-Acebes MA, Saiz J-C, Jiménez de Oya N. Antibody-Dependent  
549 Enhancement and Zika: Real Threat or Phantom Menace? *Front Cell Infect*

- 550           Microbiol. **2018**; 8(February):2014–2017.
- 551   44.   Terzian ACB, Schanoski AS, Oliveira Mota MT De, et al. Viral load and  
552           cytokine response profile does not support antibody-dependent enhancement  
553           in Dengue-Primed Zika Virus-infected patients. Clin Infect Dis. **2017**;  
554           65(8):1260–1265.
- 555   45.   Lee H-J, Cho Y, Kang HJ, et al. Identification of peptide based B-cell epitopes  
556           in Zika virus NS1. Biochem Biophys Res Commun **2018**; 505(4):1010-1014.
- 557   46.   Freire MCLC, Pol-Fachin L, Coêlho DF, et al. Mapping Putative B-Cell Zika  
558           Virus NS1 Epitopes Provides Molecular Basis for Anti-NS1 Antibody  
559           Discrimination between Zika and Dengue Viruses. ACS Omega. **2017**;  
560           2(7):3913–3920.
- 561   47.   Song H, Qi J, Haywood J, Shi Y, Gao GF. Zika virus NS1 structure reveals  
562           diversity of electrostatic surfaces among flaviviruses. Nat Struct Mol Biol. **2016**;  
563           23(5):456–458.
- 564   48.   Her Z, Kam YW, Gan VC, et al. Severity of Plasma Leakage Is Associated  
565           With High Levels of Interferon  $\gamma$ -Inducible Protein 10, Hepatocyte Growth  
566           Factor, Matrix Metalloproteinase 2 (MMP-2), and MMP-9 During Dengue Virus  
567           Infection. J Infect Dis. **2017**; 215(1):42–51.
- 568

569 **Table 1. Singapore ZIKV and DENV patients' response to ZIKV and DENV peptides**

| Protein | Peptide no | Percentage recognition (%) <sup>a</sup> |              |                      |              | Mean binding capacity <sup>b</sup> |               | Relative difference <sup>c</sup> | Epitope classification <sup>d</sup> |
|---------|------------|-----------------------------------------|--------------|----------------------|--------------|------------------------------------|---------------|----------------------------------|-------------------------------------|
|         |            | ZIKV patients (n=30-44)                 |              | DENV patients (n=20) |              | ZIKV patients                      | DENV patients |                                  |                                     |
|         |            | ZIKV peptide                            | DENV peptide | ZIKV peptide         | DENV peptide |                                    |               |                                  |                                     |
| prM     | 1          | 55                                      | 39           | 55                   | 40           | 0.244                              | 0.226         | 0.018                            |                                     |
|         | 2          | 63                                      | 60           | 95                   | 80           | 0.634                              | 0.612         | 0.022                            |                                     |
|         | 3          | 70                                      | 66           | 80                   | 75           | 0.132                              | -0.033        | 0.165                            | ZIKV-specific                       |
|         | 4          | 30                                      | 50           | 0                    | 15           | -0.356                             | -0.346        | 0.010                            |                                     |
|         | 5          | 59                                      | 45           | 55                   | 50           | 0.306                              | 0.272         | 0.034                            |                                     |
|         | 6          | 59                                      | 61           | 40                   | 50           | -0.120                             | -0.079        | 0.041                            |                                     |
|         | 7          | 86                                      | 86           | 90                   | 85           | 0.056                              | 0.014         | 0.042                            | Common                              |
|         | 8          | 59                                      | 64           | 30                   | 0            | -0.088                             | -0.293        | 0.205                            |                                     |
|         | 9          | 52                                      | 55           | 25                   | 60           | -0.210                             | -0.455        | 0.246                            | DENV-specific                       |
|         | 10         | 62                                      | 86           | 40                   | 70           | -0.263                             | -0.355        | 0.092                            |                                     |
| E       | 11         | 64                                      | 61           | 55                   | 35           | 0.066                              | 0.271         | 0.205                            |                                     |
|         | 12         | 84                                      | 89           | 65                   | 65           | 0.065                              | 0.076         | 0.011                            |                                     |
|         | 13         | 59                                      | 57           | 30                   | 20           | -0.030                             | 0.088         | 0.118                            |                                     |
|         | 14         | 68                                      | 66           | 60                   | 65           | -0.015                             | 0.043         | 0.059                            |                                     |
|         | 15         | 61                                      | 64           | 30                   | 50           | -0.138                             | -0.157        | 0.020                            |                                     |
|         | 16         | 53                                      | 90           | 55                   | 85           | -0.415                             | -0.379        | 0.036                            |                                     |
|         | 17         | 70                                      | 75           | 55                   | 85           | 0.084                              | -0.227        | 0.311                            | DENV-specific                       |
|         | 18         | 70                                      | 100          | 85                   | 100          | -0.218                             | -0.260        | 0.042                            |                                     |
|         | 19         | 57                                      | 57           | 50                   | 55           | 0.084                              | 0.006         | 0.078                            |                                     |
|         | 20         | 60                                      | 50           | 30                   | 20           | 0.186                              | 0.314         | 0.129                            |                                     |
|         | 21         | 54                                      | 78           | 25                   | 45           | -0.314                             | -0.264        | 0.050                            |                                     |
|         | 22         | 47                                      | 37           | 25                   | 0            | 0.610                              | 0.620         | 0.010                            |                                     |
|         | 23         | 34                                      | 30           | 0                    | 0            | 0.152                              | N.A.          | N.A.                             |                                     |
|         | 24         | 86                                      | 98           | 90                   | 100          | -0.235                             | -0.041        | 0.194                            |                                     |
|         | 25         | 77                                      | 75           | 55                   | 40           | 0.177                              | 0.209         | 0.032                            |                                     |
|         | 26         | 64                                      | 59           | 25                   | 25           | 0.340                              | 0.173         | 0.167                            | ZIKV-specific                       |

|            |    |     |     |     |     |        |        |       |               |
|------------|----|-----|-----|-----|-----|--------|--------|-------|---------------|
|            | 27 | 68  | 78  | 40  | 50  | -0.081 | -0.114 | 0.033 |               |
|            | 28 | 87  | 90  | 95  | 95  | 0.095  | -0.001 | 0.097 |               |
|            | 29 | 76  | 70  | 40  | 45  | -0.109 | -0.018 | 0.090 |               |
|            | 30 | 64  | 80  | 45  | 55  | -0.182 | -0.157 | 0.025 |               |
|            | 31 | 93  | 95  | 90  | 75  | 0.319  | 0.681  | 0.362 |               |
|            | 32 | 100 | 100 | 100 | 100 | 0.189  | 0.039  | 0.150 | ZIKV-specific |
|            | 33 | 82  | 86  | 65  | 60  | 0.013  | 0.033  | 0.020 |               |
|            | 34 | 86  | 82  | 90  | 50  | 0.431  | 0.853  | 0.422 |               |
|            | 35 | 84  | 89  | 65  | 70  | -0.223 | -0.134 | 0.089 |               |
|            | 36 | 79  | 83  | 80  | 90  | 0.012  | -0.031 | 0.042 | Common        |
|            | 37 | 84  | 82  | 60  | 60  | -0.012 | -0.023 | 0.011 |               |
|            | 38 | 82  | 89  | 60  | 70  | 0.019  | 0.000  | 0.019 | Common        |
|            | 39 | 89  | 91  | 75  | 75  | -0.041 | -0.069 | 0.027 | Common        |
|            | 40 | 89  | 91  | 80  | 75  | -0.082 | -0.079 | 0.002 |               |
|            | 41 | 68  | 66  | 35  | 35  | 0.154  | 0.103  | 0.051 |               |
| <b>NS1</b> | 42 | 68  | 59  | 35  | 35  | 0.177  | 0.110  | 0.068 |               |
|            | 43 | 84  | 91  | 75  | 95  | -0.137 | -0.244 | 0.107 | DENV-specific |
|            | 44 | 81  | 83  | 65  | 45  | 0.192  | 0.183  | 0.010 |               |
|            | 45 | 84  | 89  | 55  | 75  | -0.131 | -0.267 | 0.136 | DENV-specific |
|            | 46 | 84  | 82  | 70  | 60  | 0.118  | 0.098  | 0.020 | Common        |
|            | 47 | 82  | 86  | 50  | 70  | -0.132 | -0.120 | 0.012 |               |
|            | 48 | 84  | 59  | 65  | 35  | -0.757 | 1.234  | 1.992 |               |
|            | 49 | 78  | 86  | 50  | 60  | -0.019 | -0.019 | 0.001 | Common        |
|            | 50 | 80  | 75  | 80  | 40  | 0.334  | 0.720  | 0.386 |               |
|            | 51 | 86  | 83  | 90  | 80  | 0.019  | 0.160  | 0.141 |               |

570 <sup>a</sup>Patient samples are positive if their normalized peptide responses (calculated as OD of patient sample/mean OD of pooled  
 571 healthy) are more than 1.01.

572

573 <sup>b</sup>Binding capacity of a patient positive for a peptide-pair was calculated using normalized values of: [(ZIKV peptide response-DENV  
574 peptide response)/DENV peptide response]. Values close to 0 denote equal recognition of sample to ZIKV and DENV peptide.  
575 Values more than 0 denote a sample recognizing ZIKV peptide more. Values less than 0 denote a sample recognizing DENV  
576 peptide more.

577

578 <sup>c</sup>Relative difference is calculated as the difference in the mean binding capacity of ZIKV patients and DENV patients. Values are  
579 rounded up to 3 decimal places.

580

581 <sup>d</sup>Common flavivirus epitopes:  $\geq 60\%$  of ZIKV and DENV patients recognize both ZIKV and DENV peptides of peptide-pair; ZIKV-  
582 specific epitopes:  $\geq 60\%$  of ZIKV patients recognize at least ZIKV peptide of peptide-pair; DENV-specific epitopes:  $\geq 60\%$  of DENV  
583 patients recognize at least DENV peptide of peptide-pair.

584 **Table 2. Diagnostic evaluation of linear B-cell epitopes**

| Analysis           | Epitope classification | Protein           | Peptide no | No of patients <sup>a</sup> |               |                |                | Sensitivity (%) <sup>b</sup> | Specificity (%) <sup>c</sup> |      |
|--------------------|------------------------|-------------------|------------|-----------------------------|---------------|----------------|----------------|------------------------------|------------------------------|------|
|                    |                        |                   |            | True positive               | True negative | False negative | False positive |                              |                              |      |
| Individual peptide | Common flavivirus      | prM               | 7          | 22                          | 4             | 3              | 9              | 88.0                         | 30.8                         |      |
|                    |                        |                   | 36         | 18                          | 9             | 7              | 4              | 72.0                         | 69.2                         |      |
|                    |                        | NS1               | 38         | 18                          | 7             | 7              | 6              | 72.0                         | 53.8                         |      |
|                    |                        |                   | 39         | 17                          | 6             | 8              | 7              | 68.0                         | 46.2                         |      |
|                    |                        |                   | 46         | 16                          | 8             | 9              | 5              | 64.0                         | 61.5                         |      |
|                    |                        |                   | 49         | 14                          | 11            | 11             | 2              | 56.0                         | 84.6                         |      |
|                    | ZIKV-specific          | prM               | 3          | 6                           | 24            | 4              | 4              | 60.0                         | 85.7                         |      |
|                    |                        | E                 | 26         | 8                           | 24            | 2              | 4              | 80.0                         | 85.7                         |      |
|                    | DENV-specific          | prM               | 9          | 8                           | 16            | 7              | 7              | 53.3                         | 69.6                         |      |
|                    |                        |                   | E          | 17                          | 9             | 10             | 6              | 13                           | 60.0                         | 43.5 |
|                    |                        | NS1               | 43         | 11                          | 6             | 4              | 17             | 73.3                         | 26.1                         |      |
|                    |                        |                   | 45         | 4                           | 17            | 11             | 6              | 26.7                         | 73.9                         |      |
|                    | Peptide combination    | Common flavivirus | NS1        | 36                          | 17            | 8              | 8              | 5                            | 68                           | 61.5 |
|                    |                        |                   |            | 38                          |               |                |                |                              |                              |      |
| 46                 |                        |                   |            |                             |               |                |                |                              |                              |      |
| 49                 |                        |                   |            |                             |               |                |                |                              |                              |      |
| ZIKV-specific      |                        | prM               | 3          | 6                           | 27            | 5              | 1              | 54.5                         | 96.4                         |      |
|                    |                        | E                 | 26         |                             |               |                |                |                              |                              |      |
| DENV-specific      |                        | prM               | 9          | 8                           | 16            | 7              | 7              | 53.3                         | 69.6                         |      |

585 <sup>a</sup>ZIKV (n=10) and DENV (n=10) patients from Singapore, and DENV (n=5), bacteria (n=5) and unknown (n=8) patients from  
 586 Thailand were used in the diagnostic evaluation.

587 <sup>b</sup>Sensitivity is calculated as the percentage of [true positive patients / (true positive patients + false negative patients)].

588 °Specificity is calculated as the percentage of [true negative patients / (true negative patients + false positive patients)].



## 589 **Figure Legends**

### 590 **Figure 1. Antibody profiles of ZIKV patients of Singapore cohort in 2016 over**

591 **time.** (A-C) Total anti-ZIKV (A) IgM and (B) IgG antibody titers in patients' plasma

592 samples, at dilutions 1:200 and 1:2000 respectively, were determined by virion-

593 based ELISA using purified ZIKV virions. Pooled plasma of healthy donors were

594 used as negative control. Data are presented as mean  $\pm$  SEM, with dotted line

595 indicating mean of pooled healthy control. (C) Number and percentage of patients

596 that are positive or negative for anti-ZIKV IgM and IgG at the respective time points.

597 (D) IgG isotype titers in patients' plasma samples were determined at 1:200 dilution

598 in a ZIKV virion-based ELISA. Data are presented as mean  $\pm$  SEM, with dotted line

599 indicating mean of pooled healthy control. All ELISA readings were conducted in

600 duplicates or triplicates. [Acute (n=58), early convalescent (n=43), late convalescent

601 (n=45), early recovery (n=41), late recovery (n=38), full recovery (n=32)]. (E-F) *In*

602 *vitro* neutralizing capacity of pooled ZIKV patients and pooled healthy control were

603 tested at 1:1000 plasma dilution via flow cytometry. (E) Plasma samples were pooled

604 according to levels of anti-ZIKV IgG titer [group of low titer patients are denoted as

605 square symbol, while group of high titers are denoted as triangle symbol as shown in

606 (B)] for acute [low (n=37), high (n=21)], early convalescent [low (n=29), high (n=14)],

607 and late convalescent [low (n=28), high (n=17)] time points. (F) Plasma samples

608 collected at the recovery phases were pooled together at the respective time points

609 [early recovery (n=41), late recovery (n=38), full recovery (n=32)]. Results are

610 expressed as percentage of control infection. Data presented as mean  $\pm$  SD and

611 representative of 2 independent experiments. Statistical analysis between low and

612 high anti-ZIKV IgG titer groups was carried out using Mann-Whitney two-tailed test,

613 with Bonferroni correction for multiple testing (\* $p$ <0.05).

614 **Figure 2. Mapping of common flavivirus, ZIKV-specific, and DENV-specific**  
615 **linear B cell epitopes using ZIKV and DENV patient samples.** (A) Polyprotein of  
616 ZIKV H/PF/2013 (UniProtKB accession: A0A024B7W1). Plasma samples of ZIKV  
617 patients (n=30-44) and serum samples of DENV (n=20) patients at late convalescent  
618 phase were tested at 1:2000 dilution in a peptide-based ELISA in duplicates, using  
619 peptides that cover the precursor of membrane (prM: peptides 1-10), envelope (E;  
620 peptides 11-32) and non-structural 1 (NS1; peptides 33-51) proteins of ZIKV and  
621 DENV proteome. IgG response of patients were normalized to mean of pooled  
622 healthy control. Patients' response to ZIKV and DENV peptide-pairs were compared  
623 and the mean binding capacity are presented in a heat-map. A value of 0 on the  
624 scale denotes patients showing equal binding response to a ZIKV and DENV  
625 peptide-pair, whereas values larger than 0 show preferential of patients to bind to  
626 ZIKV peptide. Values smaller than 0 show binding preference of patients to DENV  
627 peptide. (B) A schematic representation to denote common flavivirus (green), ZIKV-  
628 specific (red), and DENV-specific (blue) peptides across prM, E and NS1 based on  
629 heat-map analysis above. (C-E) Genome organization of ZIKV prM, E and NS1.  
630 Regions of amino acids corresponding to the identified linear B-cell epitopes in (C)  
631 prM, (D) E and (E) NS1 are shown, with green areas denoting common flavivirus,  
632 red denoting ZIKV-specific, and blue denoting DENV-specific epitopes. Numbers in  
633 colored boxes denote the peptide number, and the amino acid position in the  
634 respective proteome.

635

636 **Figure 3. Characterization of the antibody profile kinetics of ZIKV patients on**  
637 **common flavivirus and ZIKV-specific linear B-cell epitopes, and localization of**  
638 **potential epitopes within the ZIKV and DENV proteome.** (A-B) Plasma samples

639 of ZIKV patients (n=27) at acute, late convalescent and full recovery phases were  
640 tested for IgG at 1:2000 dilution in duplicates using ZIKV and DENV peptides in a  
641 peptide-based ELISA. Pooled plasma of healthy donors was used as negative  
642 control and patients' data were normalized to mean of pooled healthy control. (A)  
643 Percentage of ZIKV patients positively binding to ZIKV and DENV peptides, and (B)  
644 binding capacity of ZIKV patients positively binding to peptides were calculated and  
645 presented in a heat-map. (C-E) Schematic diagrams showing the localization of  
646 common flavivirus (denoted as shades of green), ZIKV-specific (denoted as shades  
647 of red), and DENV-specific (denoted as shades of blue) epitopes on (C) prM protein  
648 of ZIKV and DENV (PDB: 4B03), (D) E glycoprotein of ZIKV (PDB: 5IZ7) and DENV  
649 (PDB: 4B03), and (E) NS1 protein of ZIKV and DENV (PDB: 5K6K).

650

651 **Figure 4. Preliminary diagnostic validation of identified linear B-cell epitopes**  
652 **with patient cohorts.** Convalescent plasma samples of ZIKV (n=10) and serum  
653 samples of DENV (n=10) patients from Singapore, and DENV (n=5), bacteria (n=5)  
654 and unknown (n=8) patients from Thailand were tested in a peptide-based ELISA in  
655 duplicates at 1:2000 dilution. Pooled healthy plasma was used as a negative control.  
656 (A) Sensitivity and specificity were determined for individual peptides. (B) Sensitivity  
657 and specificity of peptide mix of selected epitopes were determined. (C) Principal  
658 component analysis (PCA) of pooled healthy and patients' anti-IgG peptide response  
659 (OD values) were plotted in a graph with the percentage of variance indicated. (D-E)  
660 The peptide binding capacity of patients positively binding to peptides were  
661 calculated and statistically analyzed by using Kruskal-Wallis tests with Bonferroni  
662 correction for multiple testing. Post hoc tests were done using Dunn's multiple  
663 comparison tests to determine (D) peptides with discriminating power, and (E) the

664 peptide binding capacity distribution of patients. Data are presented as mean  $\pm$  SD.

665 (\* $p$ <0.05, \*\* $p$ <0.01).

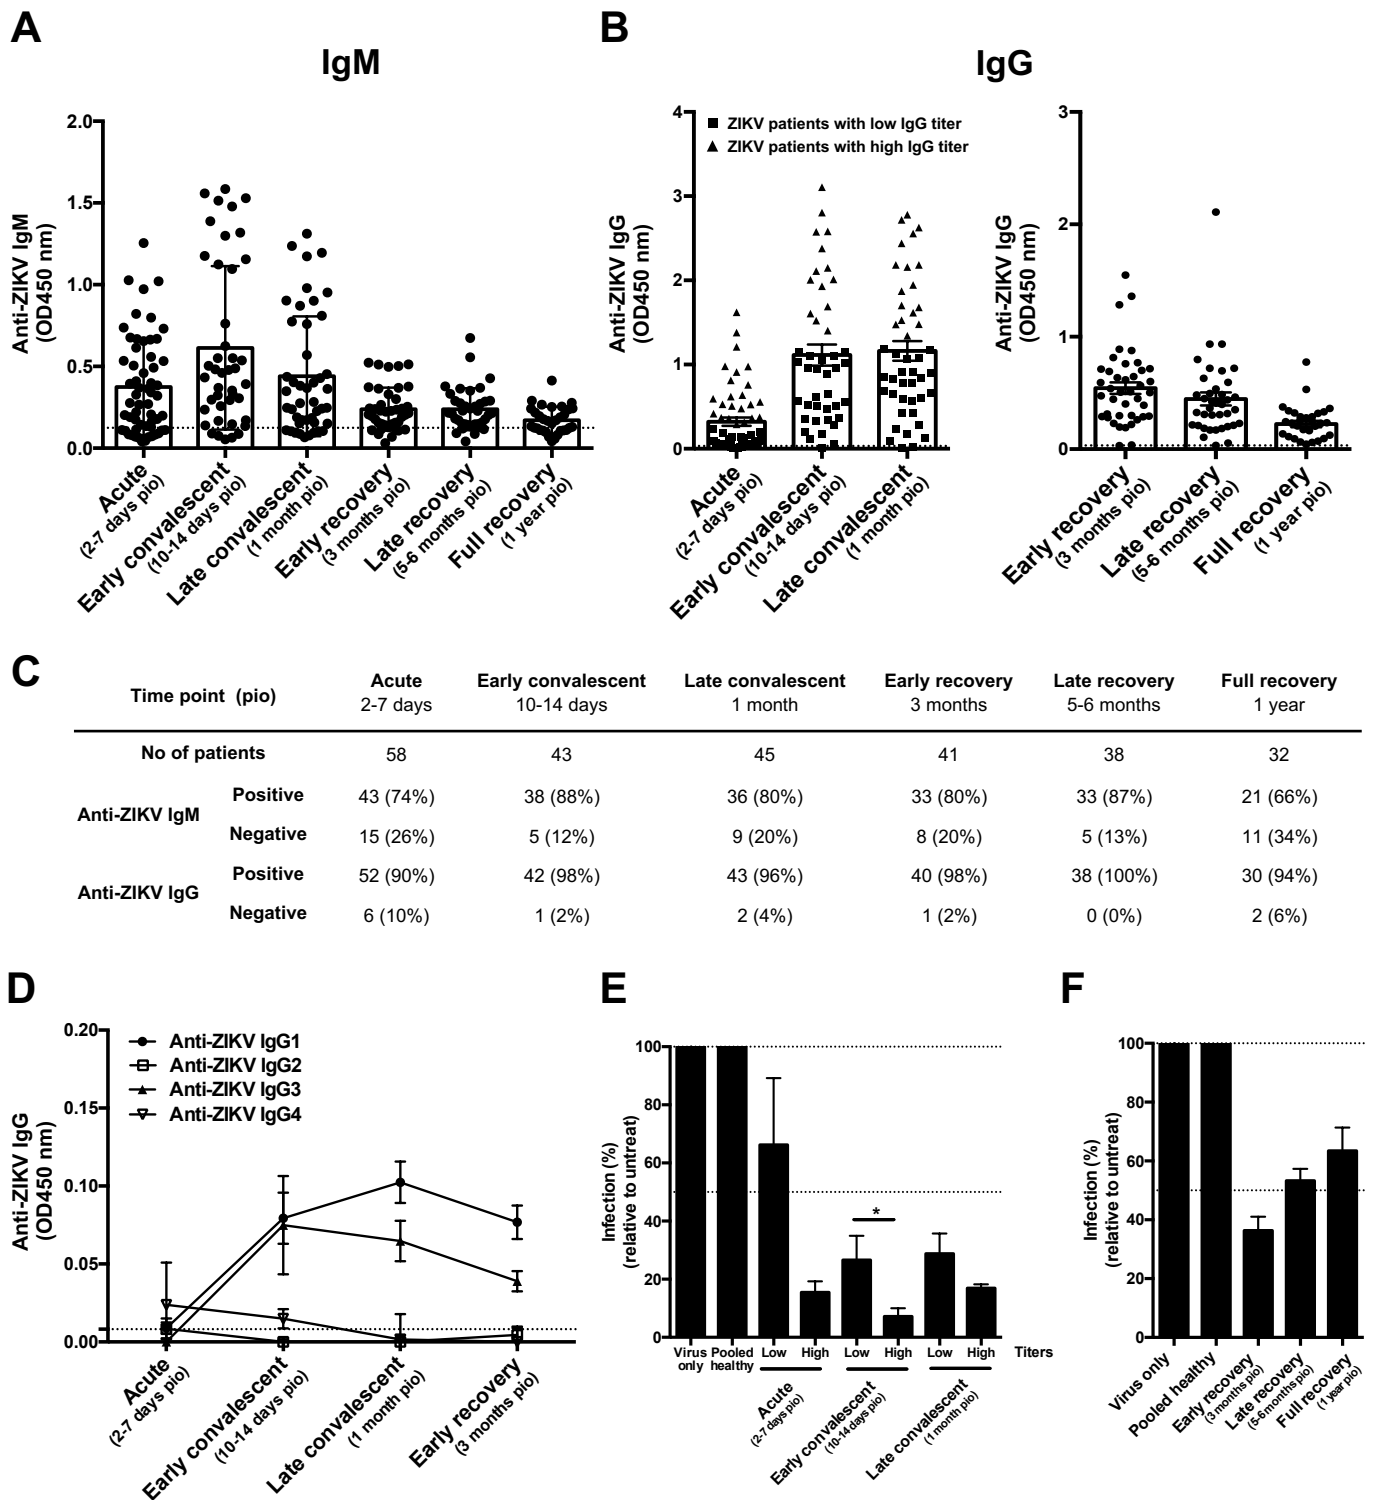

**Figure 1. Antibody profiles of ZIKV patients of Singapore cohort in 2016 over time.** (A-C) Total anti-ZIKV (A) IgM and (B) IgG antibody titers in patients' plasma samples, at dilutions 1:200 and 1:2000 respectively, were determined by virion-based ELISA using purified ZIKV virions. Pooled plasma of healthy donors were used as negative control. Data are presented as mean  $\pm$  SEM, with dotted line indicating mean of pooled healthy control. (C) Number and percentage of patients that are positive or negative for anti-ZIKV IgM and IgG at the respective time points. (D) IgG isotype titers in patients' plasma samples were determined at 1:200 dilution in a ZIKV virion-based ELISA. Data are presented as mean  $\pm$  SEM, with dotted line indicating mean of pooled healthy control. All ELISA readings were conducted in duplicates or triplicates. [Acute (n=58), early convalescent (n=43), late convalescent (n=45), early recovery (n=41), late recovery (n=38), full recovery (n=32)]. (E-F) *In vitro* neutralizing capacity of pooled ZIKV patients and pooled healthy control were tested at 1:1000 plasma dilution via flow cytometry. (E) Plasma samples were pooled according to levels of anti-ZIKV IgG titer [group of low titer patients are denoted as square symbol, while group of high titers are denoted as triangle symbol as shown in (B)] for acute [low (n=37), high (n=21)], early convalescent [low (n=29), high (n=14)], and late convalescent [low (n=28), high (n=17)] time points. (F) Plasma samples collected at the recovery phases were pooled together at the respective time points [early recovery (n=41), late recovery (n=38), full recovery (n=32)]. Results are expressed as percentage of control infection. Data presented as mean  $\pm$  SD and representative of 2 independent experiments. Statistical analysis between low and high anti-ZIKV IgG titer groups was carried out using Mann-Whitney two-tailed test, with Bonferroni correction for multiple testing (\* $p$ <0.05).

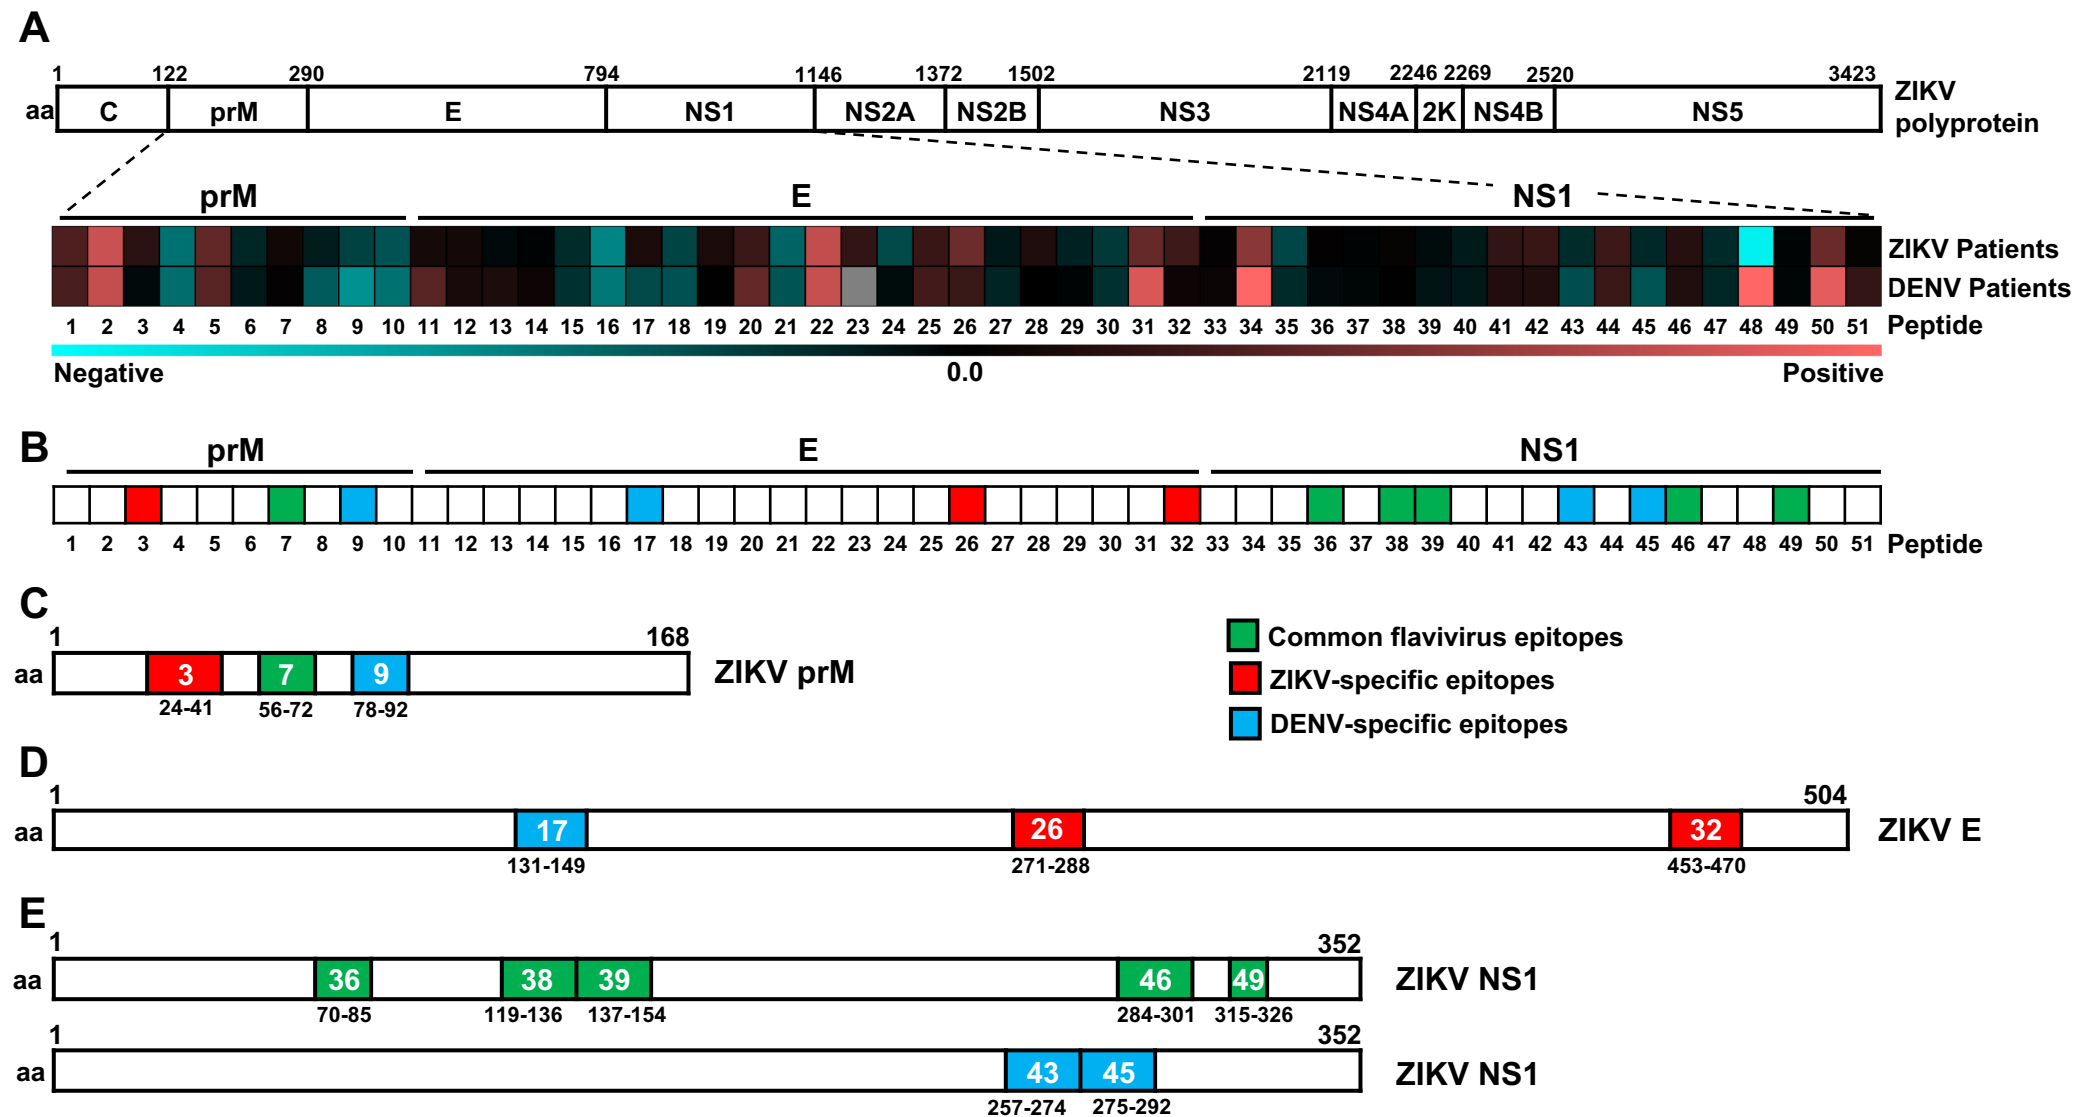

**Figure 2. Mapping of common flavivirus, ZIKV-specific, and DENV-specific linear B cell epitopes using ZIKV and DENV patient samples.** (A) Polyprotein of ZIKV H/PF/2013 (UniProtKB accession: A0A024B7W1). Plasma samples of ZIKV patients (n=30-44) and serum samples of DENV (n=20) patients at late convalescent phase were tested at 1:2000 dilution in a peptide-based ELISA in duplicates, using peptides that cover the precursor of membrane (prM: peptides 1-10), envelope (E; peptides 11-32) and non-structural 1 (NS1; peptides 33-51) proteins of ZIKV and DENV proteome. IgG response of patients were normalized to mean of pooled healthy control. Patients' response to ZIKV and DENV peptide-pairs were compared and the mean binding capacity are presented in a heat-map. A value of 0 on the scale denotes patients showing equal binding response to a ZIKV and DENV peptide-pair, whereas values larger than 0 show preferential of patients to bind to ZIKV peptide. Values smaller than 0 show binding preference of patients to DENV peptide. (B) A schematic representation to denote common flavivirus (green), ZIKV-specific (red), and DENV-specific (blue) peptides across prM, E and NS1 based on heat-map analysis above. (C-E) Genome organization of ZIKV prM, E and NS1. Regions of amino acids corresponding to the identified linear B-cell epitopes in (C) prM, (D) E and (E) NS1 are shown, with green areas denoting common flavivirus, red denoting ZIKV-specific, and blue denoting DENV-specific epitopes. Numbers in colored boxes denote the peptide number, and the amino acid position in the respective proteome.

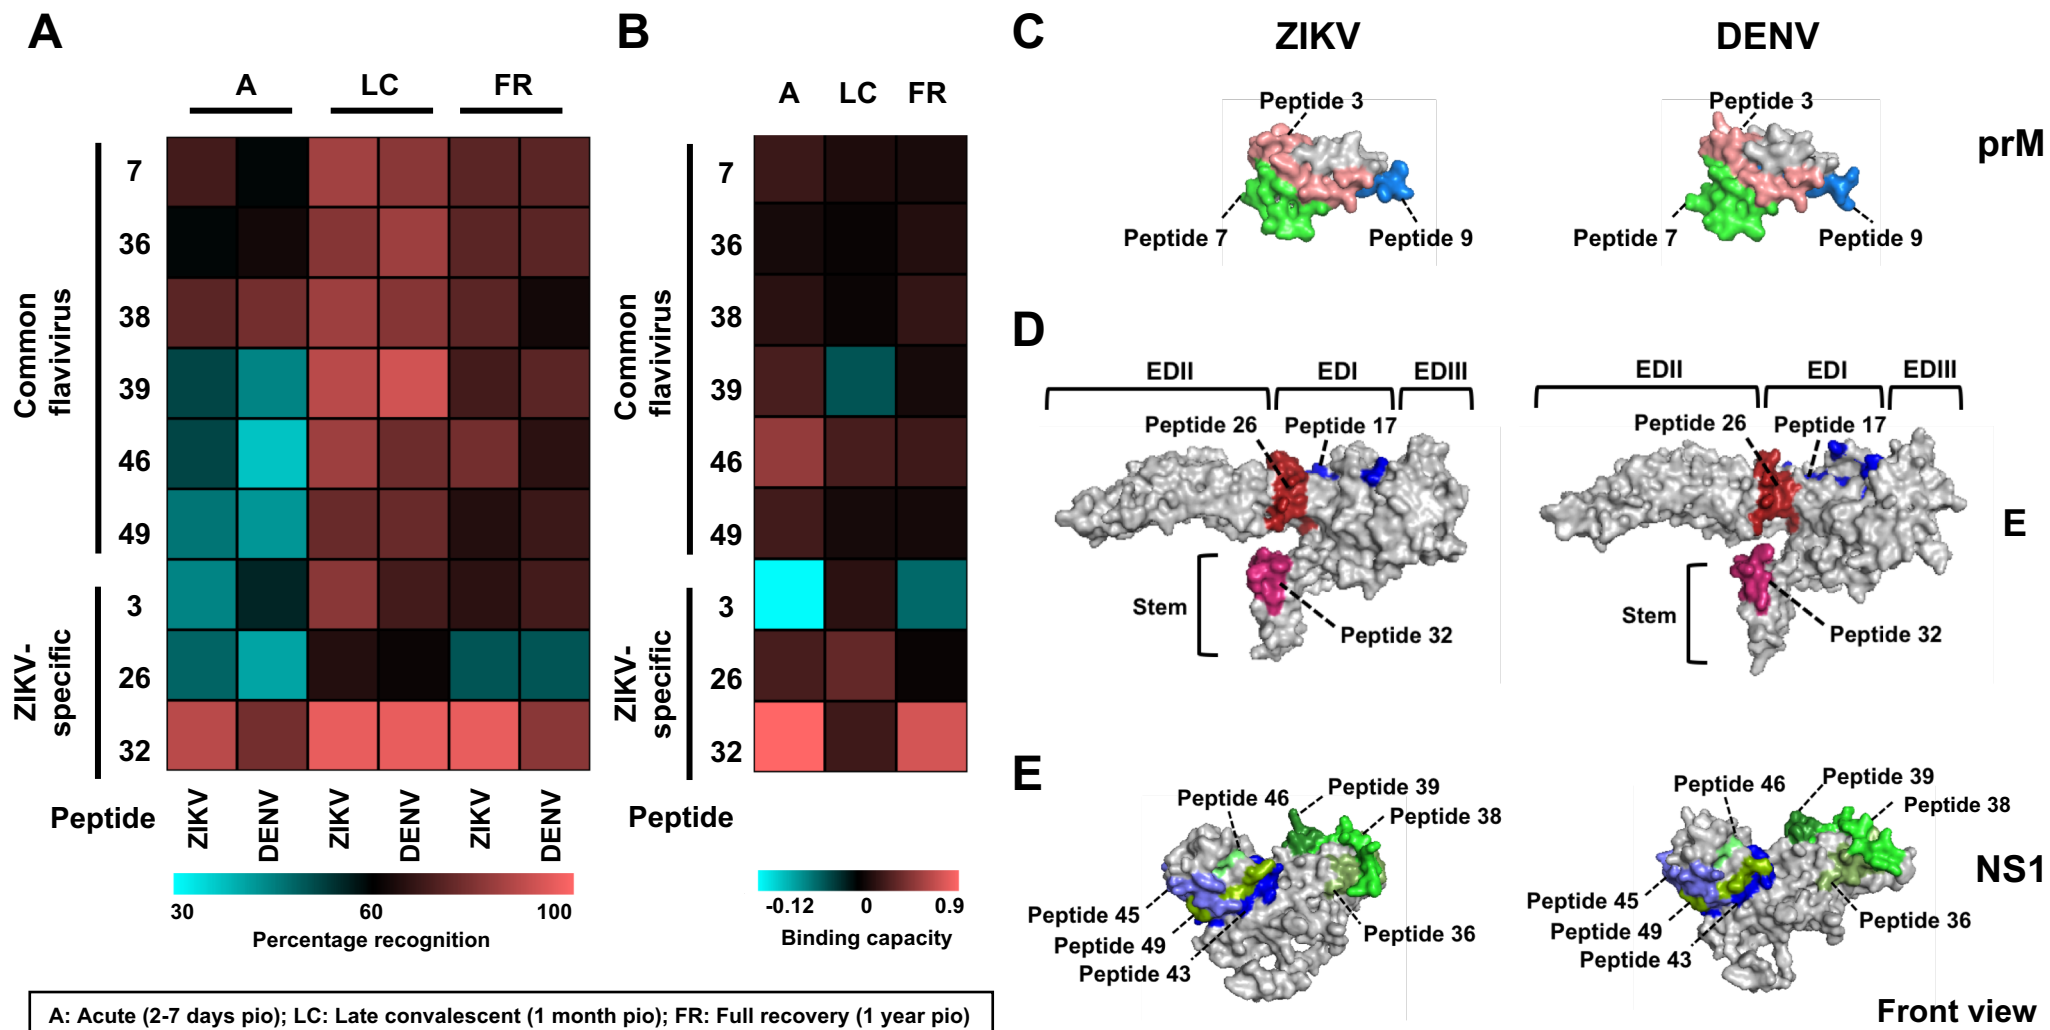

**Figure 3. Characterization of the antibody profile kinetics of ZIKV patients on common flavivirus and ZIKV-specific linear B-cell epitopes, and localization of potential epitopes within the ZIKV and DENV proteome.** (A-B) Plasma samples of ZIKV patients (n=27) at acute, late convalescent and full recovery phases were tested for IgG at 1:2000 dilution in duplicates using ZIKV and DENV peptides in a peptide-based ELISA. Pooled plasma of healthy donors was used as negative control and patients' data were normalized to mean of pooled healthy control. (A) Percentage of ZIKV patients positively binding to ZIKV and DENV peptides, and (B) binding capacity of ZIKV patients positively binding to peptides were calculated and presented in a heat-map. (C-E) Schematic diagrams showing the localization of common flavivirus (denoted as shades of green), ZIKV-specific (denoted as shades of red), and DENV-specific (denoted as shades of blue) epitopes on (C) prM protein of ZIKV and DENV (PDB: 4B03), (D) E glycoprotein of ZIKV (PDB: 5IZ7) and DENV (PDB: 4B03), and (E) NS1 protein of ZIKV and DENV (PDB: 5K6K).

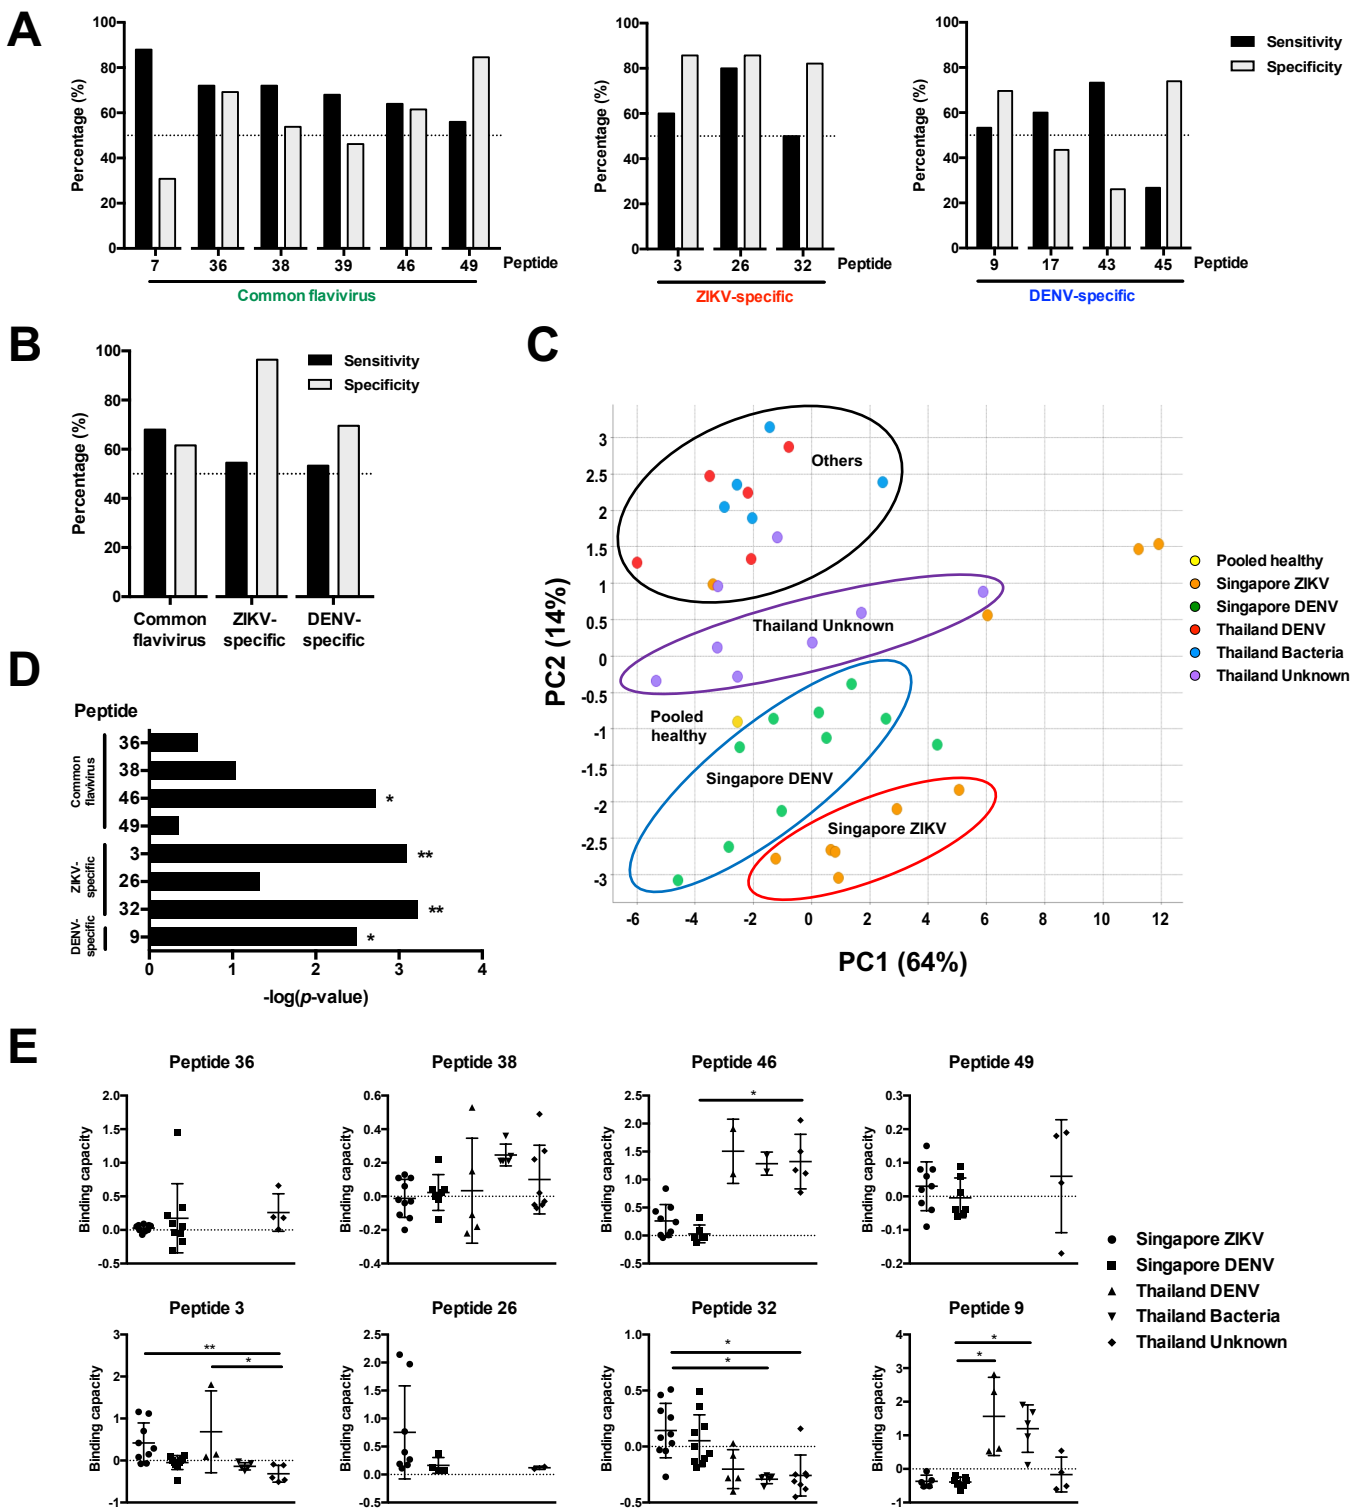

**Figure 4. Preliminary diagnostic validation of identified linear B-cell epitopes with patient cohorts.** Convalescent plasma samples of ZIKV (n=10) and serum samples of DENV (n=10) patients from Singapore, and DENV (n=5), bacteria (n=5) and unknown (n=8) patients from Thailand were tested in a peptide-based ELISA in duplicates at 1:2000 dilution. Pooled healthy plasma was used as a negative control. (A) Sensitivity and specificity were determined for individual peptides. (B) Sensitivity and specificity of peptide mix of selected epitopes were determined. (C) Principal component analysis (PCA) of pooled healthy and patients' anti-IgG peptide response (OD values) were plotted in a graph with the percentage of variance indicated. (D-E) The peptide binding capacity of patients positively binding to peptides were calculated and statistically analyzed by using Kruskal-Wallis tests with Bonferroni correction for multiple testing. Post hoc tests were done using Dunn's multiple comparison tests to determine (D) peptides with discriminating power, and (E) the peptide binding capacity distribution of patients. Data are presented as mean  $\pm$  SD. (\* $p$ <0.05, \*\* $p$ <0.01).
